# Supplementary material
Source: publisher figshare collection journal article supplement (https://springernature.figshare.com/ndownloader/files/22349049)
Supplement: Supplementary file [file 22349049]

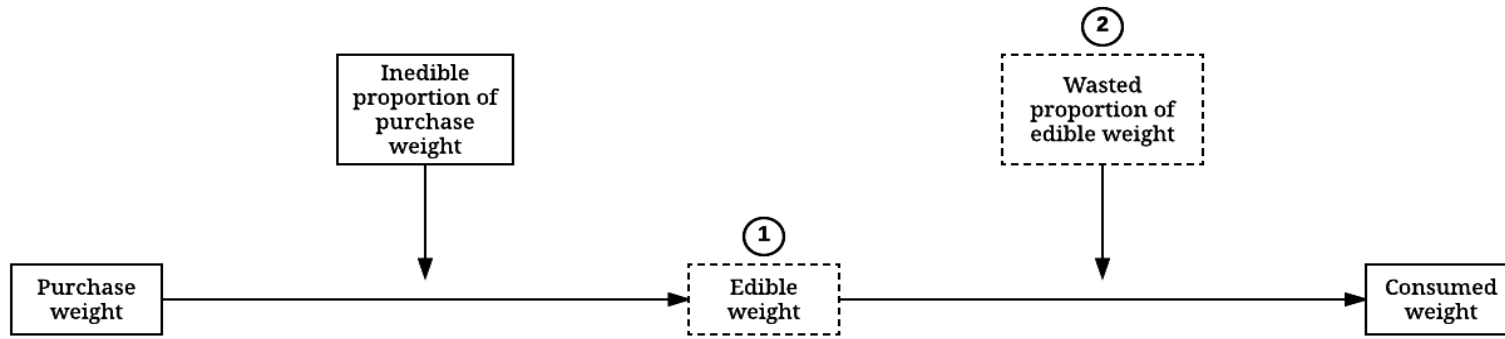

### Steps

- ① Edible weight = purchase weight x (1-inedible proportion of purchase weight)
- ② Wasted proportion of edible weight = (edible weight - consumed weight)/edible weight
